# Supplementary material
Source: publisher site journal article supplement (https://cdn.bio-protocol.org/journal/static/2305162_Supplementary%20File%201%20(P1%20Synthesis).docx)
Supplement: Supplementary file 1 [file 2305162_Supplementary%20File%201%20(P1%20Synthesis).docx]

**Scheme 1**: Synthesis of P1. (Boc2O – Di-*tert*-butyl dicarbonate; DCM – Dichloromethane; DMF – *N,N*-Dimethylformamide; EDC – 1-Ethyl-3-(3-dimethylaminopropyl) carbodiimide; HOBt – *N*-Hydroxybenzotriazole; TEA – Triethylamine; TFA – Trifluoroacetic acid)

*Materials and methods:*

2-(2-Aminoethoxy)ethanol was purchased from Merck, di-*tert*-butyl dicarbonate, anhydrous metanol, sodium hydride (60% dispersion in mineral oil), 1-hydroxybenzotriazole hydrate and trimethylamine were from Sigma-Aldrich, 4-chloro-7-chlorosulfonyl-2,1,3-benzoxadiazole and methylamine (40% in methanol) were obtained from TCI, sarcosine *tert*-butyl ester hydrochloride, 1-chloro-6-iodohexane and 1-ethyl-3-(3-dimethylamino propyl) carbodiimide hydrochloride were from Thermo Scientific, and trifluoroacetic acid, anhydrous dichloromethane and anhydrous *N,N*-dimethylformamide were from Carlo Erba. All remaining solvents were commercial grade and were used without further purification.

TLC analysis was performed in Fluka Analytical TLC plates with fluorescent indicator (254nm) and 0.2 mm thickness, which were revealed either by exposure to iodine vapors or under UV light. For flash chromatography, silica gel type G (13% CaSO4) for TLC from Sigma-Aldrich was used.

Mass analysis was performed on a Thermo Scientific Orbitrap Elite mass spectrometer using a Heated ESI (HESI-II) ion source. Data were acquired under positive polarity. ESI parameters were: heater temperature 40 ºC; sheath gas flow 10 arbitrary units; auxiliary gas; capillary temperature 325 °C; spray voltage 3.2 kV; S-Lenses RF level, 69%. Scan range was 100-1500 m/z. Sample was infused at a 10 microL/min flow.

*Synthesis of 7-methylamino-2,1,3-benzoxadiazole-4-(sulfonyl-N-methylaminoacetic acid) (****4****):*

A solution of 4-chloro-7-chlorosulfonyl-2,1,3-benzoxadiazole (**1**) (100 mg, 0.395 mmol), sarcosine *tert*-butyl ester hydrochloride (86.1 mg, 0.474 mmol) and 110 L (0.790 mmol) of triethylamine in 10 mL of anhydrous dichloromethane was stirred at room temperature for 10 min. Completion of the reaction was confirmed by TLC (elution with hexane/ethyl acetate 4:1 and revelation with iodine). The solution was washed twice with 25 mL of HCl 1 M and once with 25 mL of brine, dried over anhydrous MgSO4, filtered and evaporated, affording 144 mg (0.395 mmol, quantitative yield) of (**2**) in the form of a yellow solid.

Compound **2** was dissolved in 10 mL of anhydrous methanol and 406 L (3.98 mmol) of a 9.8 M solution of methylamine in methanol was added dropwise, under stirring. The mixture was stirred at room temperature, protected from light, for 1 h. Completion of the reaction was verified by TLC (elution with hexane/ethyl acetate 3:1 and revelation with iodine). The solvent was evaporated and the residue dissolved in 30 mL of ethyl acetate, washed twice with 30 mL of HCl 1 M and once with 50 mL of brine, dried over anhydrous MgSO4, filtered and evaporated to afford 127 mg (89% yield) of **3** as orange crystals.

A solution of compound **3** (0.356 mmol) and 928 L (12.5 mmol) of trifluoroacetic acid in 10 mL of dichloromethane was stirred for 1 h, at room temperature and protected from light. The solvent was evaporated and trifluoroacetic acid remains azeotroped with 50 mL (2 x) of toluene leading to a dark yellow solid of **4** in quantitative yield (107 mg).

*Synthesis of 2-(2-(6-chlorohexyloxy)ethoxy)ethylamine (****8****):*

One milliliter (10.1 mmol) of 2-(2-aminoethoxy)ethanol (**5**) was dissolved in 20 mL of anhydrous ethanol and the solution cooled in an ice bath. A solution of di-*tert*-butyl dicarbonate (2.18 g, 9.99 mmol) in 15 mL of anhydrous ethanol was added dropwise, under stirring. After the addition, stirring at 0 ºC was kept for 30 min and continued overnight at room temperature. Completion of the reaction was verified by TCL (elution with dichloromethane and revelation by iodine). Upon evaporation of the solvent, the residue was redissolved in 30 mL of dichloromethane, washed with 25 mL of distilled water (3 x) and once with 25 mL of brine. After being dried over anhydrous MgSO4 and filtered, the solvent was evaporated and 1.39 g (68% yield) of a colorless oil of **6** was obtained.

Compound **6** (0.68 g, 3.31 mmol) was dissolved in 15 mL of anhydrous DMF and added dropwise to an ice cooled suspension of 0.19 g (4.63 mmol) of sodium hydride in 20 mL of anhydrous DMF, and the stirring continued for 1 h, after which 0.6 mL (3.97 mmol) of 1-chloro-6-iodohexane were added. Stirring was continued, at room temperature and protected from light, for 24 h. After addition of 5 mL of 1 M HCl and 30 mL of dicloromethane, the mixture was washed with 50 mL (6 x) of distilled water and once with 50 mL of brine. The organic phase was analyzed by TLC (elution with hexane/ethyl acetate 3:1 and revelation with iodine), dried over anhydrous MgSO4, filtered and evaporated, affording a yellow oil. The oil was dissolved in 3 mL of the eluent and purified by flash chromatography. Compound **7** (264 mg, 25% yield) was obtained as a pale yellow oil.

A solution of compound **7** (0.815 mmol) and 366 L (4.89 mmol) of trifluoroacetic acid in 10 mL of anhydrous dichloromethane was stirred at room temperature for 4 h. The solvent was evaporated and excess trifluoroacetic acid co-evaporated with 25 mL (2 x) of toluene, affording 182 mg (quantitative yield) of **8** in the form of a pale yellow oil.

*Synthesis of* ***P1****:*

Compound **4** (0.356 mmol) was dissolved in 10 mL of anhydrous DMF under stirring and 130 mg (0.712 mmol) of *N*-hydroxybenzotriazole, 198 L (1.42 mmol) of triethylamine, and 140 mg (0.712 mmol) of 1-ethyl-3-(3-dimethylaminopropyl) carbodiimide were added sequentially. The resulting solution was added to compound **8** (0.813 mmol). The resulting mixture was stirred at room temperature, protected from light, for 24 h. The reaction was quenched by the addition of 20 mL of distilled water, and the resulting solution extracted with 25 mL of dichloromethane (5 x). The combined organic phases were washed with 100 mL of distilled water (5 x), dried over anhydrous MgSO4, filtered and analyzed by TLC (elution with ethyl acetate and revelation under UV light). The solvent was evaporated and the residue purified by flash chromatography, using ethyl acetate as eluent. Compound **P1** (113 mg, 55% yield) was obtained as an orange viscous oil. HRMS (ESI): *m*/*z* calc. for C20H33ClN5O6S [M+H]+ 506.1835; found 506.1813.
